# Supplementary material for: Evaluation of the Difference in the Content of Essential and Non-Essential Elements in Wild Boar and Swine Tissues Sampled in the Same Area of Northern Italy
Source: MDPI journal article supplement (doi:10.3390/ani14060827), 2024-03-07
Supplement: s1 [file s1]

# Supplementary materials

Table S1: Distribution of ages

|        | Mean     | Median | Min-Max |
|--------|----------|--------|---------|
| <2y.o. | 1.046154 | 1      | 0.6-2   |
| >2y.o. | 3.52381  | 3      | 3-5     |

Table S2: Swine diet composition.

| Ingredients           | [%]   |
|-----------------------|-------|
| Corn                  | 44.02 |
| Integral barley flour | 14.67 |
| Wheat bran            | 12.72 |
| Soya extract flour    | 8.8   |
| Carob                 | 7.83  |
| Wheat meal            | 7.83  |
| Brown molasses        | 1.96  |
| Calcium carbonate     | 1.17  |
| Sodium bicarbonate    | 0.49  |
| Sodium chloride       | 0.49  |
| L-Lysine              | 0.02  |
| TOT                   | 100   |

Figure S1: Calibration curve for Chromium.

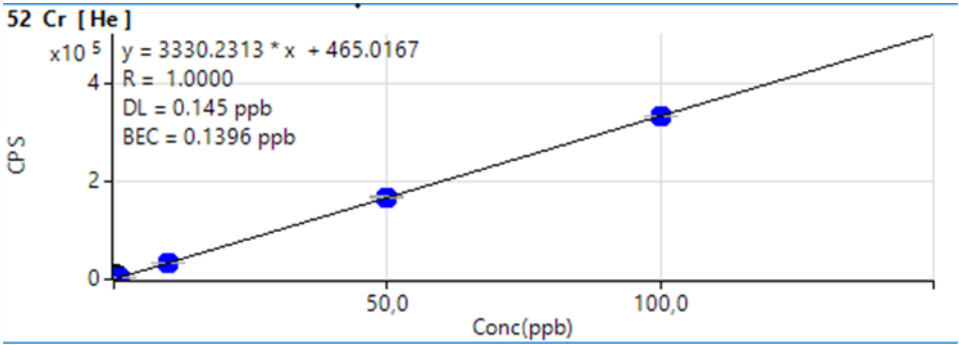

Figure S2: Calibration curve for Arsenic.

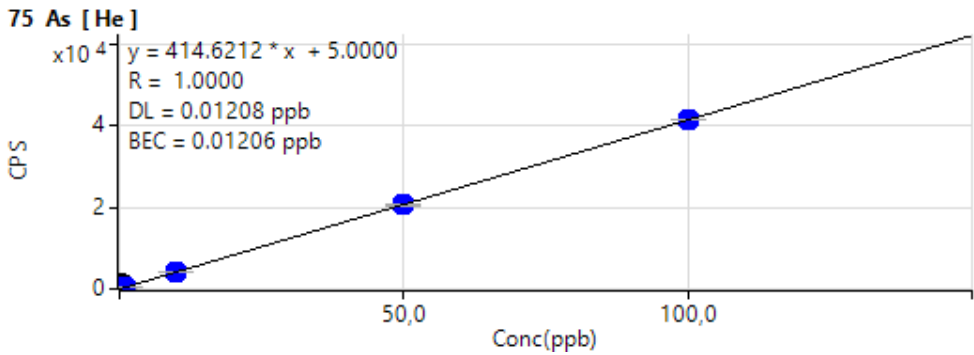

Figure S3: Calibration curve for Selenium.

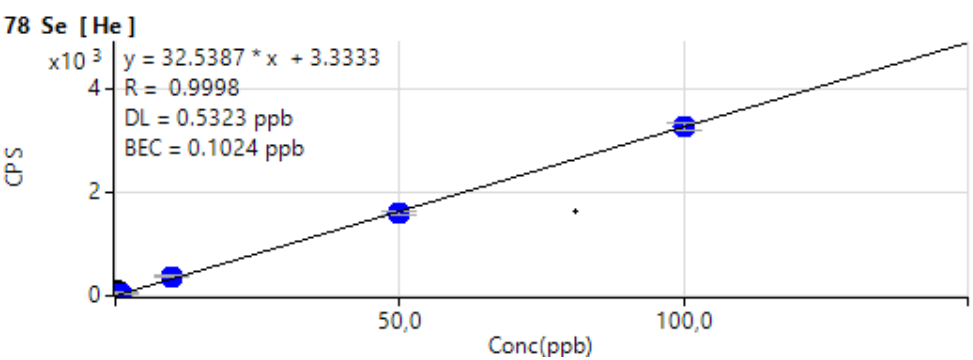

Figure S4: Calibration curve for Cadmium.

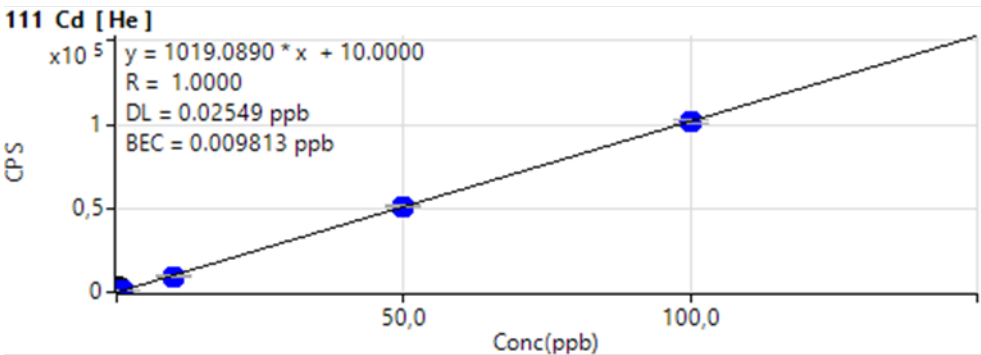

Figure S5: Calibration curve for Lead.

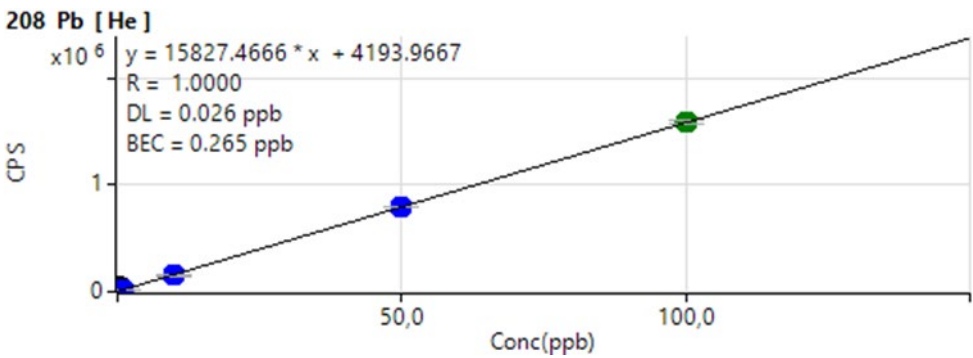

Table S3: Comparison of concentrations ( $\mu\text{g}\cdot\text{kg}^{-1}$ ) of trace and potentially toxic elements in liver of wild boar according to the two different geographic areas PV and PC

| Element | Area | Mean $\pm$ SD            | Min - Max             | 25th      | Mediana   | 75th      | p-Value |
|---------|------|--------------------------|-----------------------|-----------|-----------|-----------|---------|
| Li      | PV   | N.D.                     | N.D.                  | N.D.      | N.D.      | N.D.      |         |
|         | PC   | N.D.                     | N.D.                  | N.D.      | N.D.      | N.D.      |         |
| Be      | PV   | N.D.                     | N.D.                  | N.D.      | N.D.      | N.D.      |         |
|         | PC   | N.D.                     | N.D.                  | N.D.      | N.D.      | N.D.      |         |
| Al      | PV   | 4016.32 $\pm$ 478.02     | 3286.99 - 5059.56     | 3672.81   | 4054.09   | 4242.75   | > 0.05  |
|         | PC   | 3999.27 $\pm$ 558.16     | 3155.22 - 5320.32     | 3551.03   | 3996.69   | 4295.41   |         |
| V       | PV   | 47.15 $\pm$ 8.97         | 33.79 - 63.22         | 38.77     | 47.04     | 52.86     | > 0.05  |
|         | PC   | 45.13 $\pm$ 9.28         | 33.56 - 68.90         | 39.31     | 41.56     | 50.01     |         |
| Cr      | PV   | 57.06 $\pm$ 27.79        | 36.22 - 122.78        | 39.89     | 43.42     | 67.48     | > 0.05  |
|         | PC   | 43.19 $\pm$ 4.47         | 35.91 - 51.65         | 38.56     | 43.84     | 45.77     |         |
| Mn      | PV   | 2371.98 $\pm$ 769.24     | 1409.95 - 3595.02     | 1636.22   | 2441.56   | 2995.36   | > 0.05  |
|         | PC   | 2377.19 $\pm$ 918.99     | 1396.41 - 3917.74     | 1584.62   | 2232.57   | 3182.82   |         |
| Fe      | PV   | 210194 $\pm$ 73761.08    | 109920.34 - 356189.40 | 152940.88 | 207533.60 | 251237.68 | > 0.05  |
|         | PC   | 227208.31 $\pm$ 83912.81 | 113142.74 - 341860.26 | 163245.67 | 189854.52 | 319272.58 |         |
| Co      | PV   | 27.44 $\pm$ 4.14         | 21.69 - 35.40         | 24.52     | 26.58     | 30.07     | > 0.05  |
|         | PC   | 26.67 $\pm$ 4.77         | 21.43 - 36.63         | 23.47     | 24.25     | 30.12     |         |
| Ni      | PV   | 27.02 $\pm$ 8.16         | 15.62 - 41.06         | 20.15     | 26.15     | 33.20     | > 0.05  |
|         | PC   | 28.21 $\pm$ 8.33         | 15.59 - 39.21         | 21.80     | 26.99     | 36.94     |         |
| Cu      | PV   | 3543.53 $\pm$ 522.92     | 2682.02 - 4453.64     | 3203.49   | 3516.74   | 3849.41   | > 0.05  |
|         | PC   | 3304.78 $\pm$ 603.44     | 2393.55 - 4606.05     | 2826.75   | 3435.96   | 3635.14   |         |
| Zn      | PV   | 30371.08 $\pm$ 2874.59   | 25470.24 - 38400.22   | 28649.67  | 29814.06  | 32111.73  | > 0.05  |
|         | PC   | 31046.19 $\pm$ 3136.80   | 26822.84 - 38138.15   | 28442.01  | 31057.21  | 33525.35  |         |
| As      | PV   | 16.42 $\pm$ 10.22        | 7.06 - 34.65          | 8.25      | 13.76     | 23.43     | > 0.05  |
|         | PC   | 11.40 $\pm$ 6.34         | 7.22 - 33.89          | 7.76      | 8.77      | 13.81     |         |
| Se      | PV   | 238.09 $\pm$ 53.77       | 148.57 - 309.41       | 193.74    | 249.75    | 281.08    | > 0.05  |
|         | PC   | 240.03 $\pm$ 41.71       | 169.72 - 302.94       | 210.20    | 240.49    | 272.97    |         |
| Mo      | PV   | 758.06 $\pm$ 182.24      | 534.25 - 1023.87      | 576.53    | 769.26    | 924.70    | > 0.05  |
|         | PC   | 691.75 $\pm$ 201.90      | 481.11 - 1039.25      | 555.38    | 575.11    | 892.81    |         |
| Cd      | PV   | 156.47 $\pm$ 111.03      | 43.17 - 313.41        | 47.61     | 206.31    | 254.41    | > 0.05  |
|         | PC   | 120.87 $\pm$ 108.75      | 38.52 - 303.65        | 50.41     | 52.00     | 240.15    |         |
| Sb      | PV   | N.D.                     | N.D.                  | N.D.      | N.D.      | N.D.      |         |
|         | PC   | N.D.                     | N.D.                  | N.D.      | N.D.      | N.D.      |         |
| Ba      | PV   | 75.46 $\pm$ 19.80        | 49.830 - 101.19       | 54.55     | 78.56     | 95.34     | > 0.05  |
|         | PC   | 70.55 $\pm$ 21.81        | 50.03 - 105.29        | 51.81     | 55.65     | 93.60     |         |
| Tl      | PV   | 4.99 $\pm$ 4.30          | 0.690 - 11.40         | 1.31      | 2.29      | 10.29     | > 0.05  |
|         | PC   | 5.93 $\pm$ 3.72          | 0.70 - 11.55          | 2.32      | 5.63      | 9.45      |         |
| Pb      | PV   | 51.81 $\pm$ 10.99        | 38.94 - 71.39         | 42.59     | 48.77     | 60.02     | > 0.05  |
|         | PC   | 55.69 $\pm$ 11.07        | 39.69 - 71.96         | 47.23     | 56.75     | 64.29     |         |

Table S4: Comparison of concentrations ( $\mu\text{g} \cdot \text{kg}^{-1}$ ) of essential and non essential elements in muscle of wild boar according to the two different geographic areas PV and PC.

| Element | Area | Mean $\pm$ SD          | Min - Max           | Percentile |          |          | p-Value |
|---------|------|------------------------|---------------------|------------|----------|----------|---------|
|         |      |                        |                     | 25th       | Mediana  | 75th     |         |
| Li      | PV   | N.D.                   | N.D.                | N.D.       | N.D.     | N.D.     |         |
|         | PC   | N.D.                   | N.D.                | N.D.       | N.D.     | N.D.     |         |
| Be      | PV   | N.D.                   | N.D.                | N.D.       | N.D.     | N.D.     |         |
|         | PC   | N.D.                   | N.D.                | N.D.       | N.D.     | N.D.     |         |
| Al      | PV   | 5572.23 $\pm$ 2177.29  | 2943.25 - 8990.14   | 3700.64    | 4359.30  | 7588.88  | > 0.05  |
|         | PC   | 5114.68 $\pm$ 2023.84  | 2987.73 - 8773.58   | 3208.22    | 3961.37  | 7262.17  |         |
| V       | PV   | 72.52 $\pm$ 9.20       | 54.96 - 88.89       | 66.96      | 72.31    | 79.79    | > 0.05  |
|         | PC   | 72.86 $\pm$ 9.33       | 59.87 - 97.24       | 64.90      | 71.82    | 79.30    |         |
| Cr      | PV   | 157.86 $\pm$ 105.18    | 45.25 - 329.30      | 65.40      | 99.35    | 262.61   | > 0.05  |
|         | PC   | 85.48 $\pm$ 25.42      | 46.92 - 128.90      | 63.12      | 91.10    | 99.79    |         |
| Mn      | PV   | 628.04 $\pm$ 310.85    | 157.88 - 1126.62    | 316.93     | 624.47   | 911.58   | > 0.05  |
|         | PC   | 587.81 $\pm$ 358.94    | 170.25 - 1112.37    | 296.93     | 340.34   | 971.17   |         |
| Fe      | PV   | 31838.52 $\pm$ 8702.71 | 20628.17 - 46870.62 | 23477.91   | 29112.98 | 38065.84 | > 0.05  |
|         | PC   | 27352.26 $\pm$ 6989.32 | 20134.93 - 47678.89 | 21909.98   | 25517.20 | 31307.11 |         |
| Co      | PV   | 8.57 $\pm$ 6.06        | 3.40 - 20.20        | 4.23       | 5.53     | 14.29    | < 0.05  |
|         | PC   | 4.37 $\pm$ 0.99        | 3.07 - 5.91         | 3.50       | 4.09     | 5.32     |         |
| Ni      | PV   | 81.64 $\pm$ 35.03      | 18.54 - 135.52      | 60.48      | 78.82    | 104.52   | < 0.05  |
|         | PC   | 60.13 $\pm$ 32.88      | 17.98 - 140.74      | 20.57      | 59.82    | 79.04    |         |
| Cu      | PV   | 1836.40 $\pm$ 547.72   | 1155.87 - 2909.51   | 1467.84    | 1574.78  | 2318.64  | > 0.05  |
|         | PC   | 1489.71 $\pm$ 190.4    | 1227.15 - 1808.12   | 1293.36    | 1535.15  | 1621.39  |         |
| Zn      | PV   | 35492.01 $\pm$ 17614.1 | 16781.84 - 65909.36 | 19389.53   | 23017.68 | 48924.47 | < 0.05  |
|         | PC   | 19425.25 $\pm$ 2505.25 | 15558.35 - 23473.28 | 17825.67   | 18878.96 | 21271.08 |         |
| As      | PV   | 8.81 $\pm$ 1.59        | 6.75 - 11.84        | 7.61       | 8.41     | 9.80     | > 0.05  |
|         | PC   | 8.71 $\pm$ 1.39        | 6.90 - 11.22        | 7.54       | 8.47     | 9.55     |         |
| Se      | PV   | 116.63 $\pm$ 67.66     | 34.00 - 228.60      | 71.21      | 89.57    | 178.98   | < 0.05  |
|         | PC   | 72.70 $\pm$ 31.35      | 37.51 - 166.31      | 39.86      | 73.70    | 89.36    |         |
| Mo      | PV   | 9.44 $\pm$ 4.29        | 0.00 - 14.18        | 8.73       | 10.59    | 12.05    | > 0.05  |
|         | PC   | 10.98 $\pm$ 2.10       | 7.87 - 13.53        | 8.38       | 11.85    | 12.76    |         |
| Cd      | PV   | 11.86 $\pm$ 4.07       | 7.16 - 20.66        | 8.81       | 10.04    | 14.82    | > 0.05  |
|         | PC   | 13.34 $\pm$ 5.01       | 7.55 - 21.59        | 9.08       | 13.26    | 15.97    |         |
| Sb      | PV   | N.D.                   | N.D.                | N.D.       | N.D.     | N.D.     |         |
|         | PC   | N.D.                   | N.D.                | N.D.       | N.D.     | N.D.     |         |
| Ba      | PV   | 156.09 $\pm$ 102.76    | 54.86 - 337.08      | 62.56      | 117.89   | 245.18   | > 0.05  |
|         | PC   | 96.30 $\pm$ 45.93      | 53.88 - 228.18      | 64.08      | 68.64    | 131.27   |         |
| Tl      | PV   | 0.084 $\pm$ 0.21       | 0.00 - 0.61         | 0.00       | 0.00     | 0.00     | > 0.05  |
|         | PC   | 0.026 $\pm$ 0.12       | 0.00 - 0.55         | 0.00       | 0.00     | 0.00     |         |
| Pb      | PV   | 48.88 $\pm$ 7.43       | 35.76 - 63.35       | 43.30      | 49.21    | 51.97    | > 0.05  |
|         | PC   | 50.24 $\pm$ 8.83       | 36.79 - 65.91       | 40.59      | 50.42    | 58.56    |         |

Table S5: Comparison of concentrations ( $\mu\text{g}\cdot\text{kg}^{-1}$ ) of essential and non essential elements in liver of wild boar according to age classes.

| Element | Age class | Mean $\pm$ SD            | Min - Max             | Percentile |           |           | p-Value |
|---------|-----------|--------------------------|-----------------------|------------|-----------|-----------|---------|
|         |           |                          |                       | 25th       | Median    | 75th      |         |
| Li      | < 2 y.o.  | N.D.                     | N.D.                  | N.D.       | N.D.      | N.D.      |         |
|         | > 2 y.o.  | N.D.                     | N.D.                  | N.D.       | N.D.      | N.D.      |         |
| Be      | < 2 y.o.  | N.D.                     | N.D.                  | N.D.       | N.D.      | N.D.      |         |
|         | > 2 y.o.  | N.D.                     | N.D.                  | N.D.       | N.D.      | N.D.      |         |
| Al      | < 2 y.o.  | 3924.77 $\pm$ 468.25     | 3155.22 - 4881.72     | 3583.92    | 3976.28   | 4237.88   | > 0.05  |
|         | > 2 y.o.  | 4086 $\pm$ 554.14        | 3318.43 - 5320.32     | 3676.18    | 4094.93   | 4354.60   |         |
| V       | < 2 y.o.  | 43.06 $\pm$ 6.10         | 34.82 - 54.04         | 37.67      | 41.34     | 48.03     | > 0.05  |
|         | > 2 y.o.  | 47.86 $\pm$ 9.60         | 33.56 - 63.22         | 39.98      | 47.43     | 55.36     |         |
| Cr      | < 2 y.o.  | 42.46 $\pm$ 4.22         | 36.22 - 49.49         | 38.34      | 42.31     | 45.42     | > 0.05  |
|         | > 2 y.o.  | 57.03 $\pm$ 25.86        | 35.91 - 114.17        | 40.29      | 44.71     | 68.56     |         |
| Mn      | < 2 y.o.  | 2474.52 $\pm$ 869.63     | 1396.41 - 3915.63     | 1590.49    | 2433.28   | 3309.35   | > 0.05  |
|         | > 2 y.o.  | 2274.66 $\pm$ 811.75     | 1408.02 - 3917.74     | 1592.59    | 1853.24   | 2752.64   |         |
| Fe      | < 2 y.o.  | 213839.11 $\pm$ 81212.15 | 109920.34 - 356189.40 | 150331.42  | 189923.36 | 275494.82 | > 0.05  |
|         | > 2 y.o.  | 223563.21 $\pm$ 77392    | 113142.74 - 333019.24 | 165204.21  | 211863.29 | 291835.96 |         |
| Co      | < 2 y.o.  | 27.37 $\pm$ 4.78         | 21.43 - 36.09         | 23.34      | 25.34     | 30.81     | > 0.05  |
|         | > 2 y.o.  | 26.74 $\pm$ 4.14         | 21.77 - 36.63         | 23.71      | 25.32     | 29.09     |         |
| Ni      | < 2 y.o.  | 26.59 $\pm$ 8.20         | 15.62 - 41.06         | 20.06      | 25.01     | 32.16     | > 0.05  |
|         | > 2 y.o.  | 28.63 $\pm$ 8.21         | 15.59 - 39.21         | 23.27      | 30.20     | 35.98     |         |
| Cu      | < 2 y.o.  | 3446.61 $\pm$ 562.74     | 2621.69 - 4606.05     | 2979.32    | 3511.46   | 3767.52   | > 0.05  |
|         | > 2 y.o.  | 3401.70 $\pm$ 591.55     | 2393.55 - 4453.64     | 2956.64    | 3485.72   | 3771.05   |         |
| Zn      | < 2 y.o.  | 30071.37 $\pm$ 2480.87   | 25470.24 - 34791.74   | 28716.08   | 29585.43  | 32018.93  | > 0.05  |
|         | > 2 y.o.  | 31977.41 $\pm$ 4111.65   | 26822.84 - 40956.24   | 29117.34   | 31264.43  | 33525.35  |         |
| As      | < 2 y.o.  | 10.47 $\pm$ 3.30         | 7.06 - 15.48          | 7.60       | 8.64      | 13.76     | > 0.05  |
|         | > 2 y.o.  | 16.20 $\pm$ 10.58        | 7.42 - 34.65          | 8.13       | 12.90     | 23.35     |         |
| Se      | < 2 y.o.  | 248.31 $\pm$ 39.01       | 163.23 - 302.94       | 224.53     | 251.88    | 275.34    | > 0.05  |
|         | > 2 y.o.  | 229.82 $\pm$ 54.13       | 148.57 - 309.41       | 180.98     | 230.21    | 277.02    |         |
| Mo      | < 2 y.o.  | 713.32 $\pm$ 202.47      | 481.11 - 1024.17      | 547.18     | 607.01    | 924.70    | > 0.05  |
|         | > 2 y.o.  | 736.48 $\pm$ 187.13      | 531.50 - 1039.25      | 568.42     | 659.91    | 896.38    |         |
| Cd      | < 2 y.o.  | 131.54 $\pm$ 113.32      | 40.69 - 310.91        | 47.87      | 51.76     | 255.45    | > 0.05  |
|         | > 2 y.o.  | 145.79 $\pm$ 108.97      | 38.52 - 313.41        | 49.66      | 55.00     | 239.11    |         |
| Sb      | < 2 y.o.  | N.D.                     | N.D.                  | N.D.       | N.D.      | N.D.      |         |
|         | > 2 y.o.  | N.D.                     | N.D.                  | N.D.       | N.D.      | N.D.      |         |
| Ba      | < 2 y.o.  | 73.54 $\pm$ 21.18        | 49.83 - 101.19        | 54.55      | 59.59     | 95.56     | > 0.05  |
|         | > 2 y.o.  | 72.47 $\pm$ 20.76        | 50.27 - 105.29        | 52.56      | 77.79     | 88.71     |         |
| Tl      | < 2 y.o.  | 6.07 $\pm$ 4.03          | 0.73 - 11.55          | 2.24       | 5.49      | 10.29     | > 0.05  |
|         | > 2 y.o.  | 4.88 $\pm$ 3.98          | 0.69 - 11.19          | 1.32       | 4.96      | 7.56      |         |
| Pb      | < 2 y.o.  | 54.73 $\pm$ 10.85        | 39.69 - 71.39         | 45.34      | 54.93     | 62.77     | > 0.05  |
|         | > 2 y.o.  | 52.76 $\pm$ 11.48        | 38.94 - 71.96         | 42.59      | 47.32     | 60.96     |         |

Table S6: Comparison of concentrations ( $\mu\text{g}\cdot\text{kg}^{-1}$ ) of essential and non essential elements in muscle of wild boar according to age classes.

| Element | age      | Mean $\pm$ SD           | Min - Max           | Percentile |          |          | p-Value |
|---------|----------|-------------------------|---------------------|------------|----------|----------|---------|
|         |          |                         |                     | 25th       | Mediana  | 75th     |         |
| Li      | < 2 y.o. | N.D.                    | N.D.                | N.D.       | N.D.     | N.D.     |         |
|         | > 2 y.o. | N.D.                    | N.D.                | N.D.       | N.D.     | N.D.     |         |
| Be      | < 2 y.o. | N.D.                    | N.D.                | N.D.       | N.D.     | N.D.     |         |
|         | > 2 y.o. | N.D.                    | N.D.                | N.D.       | N.D.     | N.D.     |         |
| Al      | < 2 y.o. | 5039.20 $\pm$ 2084.94   | 2974.10 - 8235.62   | 3407.16    | 3780.52  | 7492.65  | > 0.05  |
|         | > 2 y.o. | 5647.70 $\pm$ 2098.83   | 2943.25 - 8990.14   | 3647.54    | 6379.95  | 7345.56  |         |
| V       | < 2 y.o. | 73.14 $\pm$ 9.26        | 57.41 - 88.89       | 65.12      | 72.88    | 80.23    | > 0.05  |
|         | > 2 y.o. | 70.99 $\pm$ 7.44        | 54.96 - 82.46       | 66.86      | 71.71    | 75.40    |         |
| Cr      | < 2 y.o. | 150.36 $\pm$ 94.92      | 58.63 - 324.55      | 93.07      | 99.38    | 253.46   | < 0.05  |
|         | > 2 y.o. | 94.22 $\pm$ 65.19       | 45.25 - 329.30      | 61.19      | 65.09    | 111.32   |         |
| Mn      | < 2 y.o. | 515.75 $\pm$ 314.58     | 157.88 - 1060.02    | 275.60     | 340.34   | 854.69   | < 0.05  |
|         | > 2 y.o. | 700.08 $\pm$ 330.93     | 170.25 - 1126.62    | 338.05     | 725.86   | 993.06   |         |
| Fe      | < 2 y.o. | 29091.32 $\pm$ 9648.75  | 20134.93 - 46870.62 | 21823.47   | 23477.91 | 38065.84 | > 0.05  |
|         | > 2 y.o. | 30236.82 $\pm$ 6381.18  | 20859.10 - 47678.89 | 25554.82   | 30163.97 | 33523.25 |         |
| Co      | < 2 y.o. | 7.79 $\pm$ 6.29         | 3.07 - 20.20        | 3.43       | 4.24     | 14.29    | > 0.05  |
|         | > 2 y.o. | 5.29 $\pm$ 2.14         | 3.64 - 13.33        | 4.02       | 5.21     | 5.53     |         |
| Ni      | < 2 y.o. | 74.96 $\pm$ 28.28       | 18.00 - 135.52      | 58.52      | 75.90    | 94.42    | > 0.05  |
|         | > 2 y.o. | 66.80 $\pm$ 41.43       | 17.98 - 140.74      | 20.57      | 68.48    | 94.97    |         |
| Cu      | < 2 y.o. | 1805.45 $\pm$ 469.56    | 1227.15 - 2805.83   | 1502.34    | 1599.14  | 2279.57  | < 0.05  |
|         | > 2 y.o. | 1493.91 $\pm$ 280.36    | 1155.87 - 2335.55   | 1284.09    | 1470.63  | 1621.39  |         |
| Zn      | < 2 y.o. | 30797.65 $\pm$ 17911.71 | 15558.35 - 65909.36 | 17825.67   | 20037.37 | 47558.72 | > 0.05  |
|         | > 2 y.o. | 30653.98 $\pm$ 15552.83 | 18125.32 - 64744.32 | 19589.19   | 21271.08 | 48073.32 |         |
| As      | < 2 y.o. | 8.65 $\pm$ 1.49         | 6.75 - 11.84        | 7.27       | 8.35     | 9.40     | > 0.05  |
|         | > 2 y.o. | 8.86 $\pm$ 1.49         | 6.90 - 11.28        | 7.61       | 8.59     | 10.50    |         |
| Se      | < 2 y.o. | 112.65 $\pm$ 62.35      | 37.51 - 228.60      | 73.70      | 89.57    | 166.51   | < 0.05  |
|         | > 2 y.o. | 69.58 $\pm$ 33.27       | 34.00 - 166.31      | 39.74      | 71.06    | 88.95    |         |
| Mo      | < 2 y.o. | 10.90 $\pm$ 3.02        | 0.00 - 14.18        | 10.05      | 11.73    | 12.41    | > 0.05  |
|         | > 2 y.o. | 9.44 $\pm$ 3.78         | 0.00 - 13.53        | 8.25       | 10.08    | 12.40    |         |
| Cd      | < 2 y.o. | 14.16 $\pm$ 4.73        | 8.21 - 21.59        | 9.94       | 13.52    | 17.68    | < 0.05  |
|         | > 2 y.o. | 11.02 $\pm$ 3.90        | 7.16 - 20.34        | 7.81       | 9.29     | 13.98    |         |
| Sb      | < 2 y.o. | N.D.                    | N.D.                | N.D.       | N.D.     | N.D.     |         |
|         | > 2 y.o. | N.D.                    | N.D.                | N.D.       | N.D.     | N.D.     |         |
| Ba      | < 2 y.o. | 138.18 $\pm$ 106.28     | 58.00 - 337.08      | 62.40      | 70.07    | 242.83   | > 0.05  |
|         | > 2 y.o. | 123.41 $\pm$ 62.56      | 53.88 - 262.46      | 67.13      | 124.32   | 139.82   |         |
| Tl      | < 2 y.o. | 0.02 $\pm$ 0.12         | 0.00 - 0.59         | 0.00       | 0.00     | 0.00     | > 0.05  |
|         | > 2 y.o. | 0.08 $\pm$ 0.21         | 0.00 - 0.61         | 0.00       | 0.00     | 0.00     |         |
| Pb      | < 2 y.o. | 48.06 $\pm$ 7.82        | 35.76 - 65.91       | 42.43      | 48.39    | 51.73    | > 0.05  |
|         | > 2 y.o. | 51.05 $\pm$ 8.26        | 37.20 - 63.35       | 45.05      | 53.17    | 59.11    |         |

Table S7: Comparison of concentrations ( $\mu\text{g}\cdot\text{kg}^{-1}$ ) of essential and non essential elements in liver of wild boar according to sexes.

| Element | Sex    | Mean $\pm$ SD            | Min - Max             | Percentile |           |           | p-Value |
|---------|--------|--------------------------|-----------------------|------------|-----------|-----------|---------|
|         |        |                          |                       | 25th       | Median    | 75th      |         |
| Li      | Female | N.D.                     | N.D.                  | N.D.       | N.D.      | N.D.      |         |
|         | Male   | N.D.                     | N.D.                  | N.D.       | N.D.      | N.D.      |         |
| Be      | Female | N.D.                     | N.D.                  | N.D.       | N.D.      | N.D.      |         |
|         | Male   | N.D.                     | N.D.                  | N.D.       | N.D.      | N.D.      |         |
| Al      | Female | 3984.11 $\pm$ 442.58     | 3286.99 - 4881.72     | 3681.280   | 3962.66   | 4253.28   | > 0.05  |
|         | Male   | 4038.36 $\pm$ 608.31     | 3155.22 - 5320.32     | 3518.333   | 4057.99   | 4261.40   |         |
| V       | Female | 44.99 $\pm$ 7.95         | 34.82 - 63.22         | 38.997     | 41.80     | 50.30     | > 0.05  |
|         | Male   | 47.72 $\pm$ 10.45        | 33.56 - 68.90         | 38.755     | 47.89     | 55.17     |         |
| Cr      | Female | 43.33 $\pm$ 4.12         | 36.22 - 51.65         | 40.388     | 44.23     | 45.73     | > 0.05  |
|         | Male   | 60.05 $\pm$ 30.52        | 35.91 - 122.78        | 38.505     | 42.79     | 85.52     |         |
| Mn      | Female | 2429.99 $\pm$ 868.19     | 1396.41 - 3917.74     | 1576.633   | 2368.74   | 3272.90   | > 0.05  |
|         | Male   | 2298.41 $\pm$ 810.92     | 1408.02 - 3915.63     | 1602.210   | 2076.13   | 2938.89   |         |
| Fe      | Female | 218475.40 $\pm$ 84165.05 | 109920.34 - 341860.26 | 139606.015 | 194796.24 | 315235.39 | > 0.05  |
|         | Male   | 219011.57 $\pm$ 72418.04 | 113142.74 - 356189.40 | 178715.037 | 208452.63 | 258740.53 |         |
| Co      | Female | 26.65 $\pm$ 4.66         | 21.43 - 36.63         | 23.408     | 24.95     | 29.79     | > 0.05  |
|         | Male   | 27.61 $\pm$ 4.14         | 22.26 - 36.09         | 24.108     | 27.14     | 30.12     |         |
| Ni      | Female | 27.40 $\pm$ 8.46         | 15.62 - 39.21         | 18.783     | 26.25     | 36.50     | > 0.05  |
|         | Male   | 27.89 $\pm$ 7.99         | 15.59 - 41.06         | 22.250     | 27.81     | 34.98     |         |
| Cu      | Female | 3404.56 $\pm$ 612.72     | 2532.40 - 4606.05     | 2837.965   | 3496.14   | 3797.72   | > 0.05  |
|         | Male   | 3451.09 $\pm$ 523.70     | 2393.55 - 4284.18     | 3224.195   | 3493.19   | 3720.63   |         |
| Zn      | Female | 30168.50 $\pm$ 2338.57   | 25470.24 - 34342.33   | 28649.670  | 29885.11  | 31740.53  | > 0.05  |
|         | Male   | 32100.23 $\pm$ 4257.92   | 26822.84 - 40956.24   | 28976.622  | 31688.08  | 34055.64  |         |
| As      | Female | 10.11 $\pm$ 3.19         | 7.06 - 15.40          | 7.550      | 8.43      | 13.85     | < 0.05  |
|         | Male   | 17.64 $\pm$ 10.76        | 7.60 - 34.65          | 8.763      | 13.56     | 31.52     |         |
| Se      | Female | 244.06 $\pm$ 39.21       | 164.90 - 302.90       | 220.653    | 245.12    | 276.38    | > 0.05  |
|         | Male   | 232.19 $\pm$ 57.62       | 148.57 - 309.41       | 180.280    | 245.37    | 276.31    |         |
| Mo      | Female | 706.77 $\pm$ 204.23      | 481.11 - 1024.17      | 542.530    | 577.57    | 932.05    | > 0.05  |
|         | Male   | 749.83 $\pm$ 178.93      | 527.59 - 1039.25      | 584.980    | 714.59    | 885.44    |         |
| Cd      | Female | 131.82 $\pm$ 114.09      | 38.52 - 310.91        | 48.353     | 51.88     | 269.93    | > 0.05  |
|         | Male   | 148.08 $\pm$ 106.78      | 40.69 - 313.41        | 49.902     | 130.16    | 231.77    |         |
| Sb      | Female | N.D.                     | N.D.                  | N.D.       | N.D.      | N.D.      |         |
|         | Male   | N.D.                     | N.D.                  | N.D.       | N.D.      | N.D.      |         |
| Ba      | Female | 70.30 $\pm$ 20.96        | 49.83 - 101.19        | 52.367     | 58.34     | 93.72     | > 0.05  |
|         | Male   | 76.72 $\pm$ 20.40        | 50.27 - 105.29        | 54.410     | 81.69     | 95.67     |         |
| Tl      | Female | 5.86 $\pm$ 3.93          | 0.70 - 11.55          | 2.235      | 5.43      | 10.53     | > 0.05  |
|         | Male   | 4.90 $\pm$ 4.15          | 0.69 - 11.05          | 0.750      | 3.90      | 9.43      |         |
| Pb      | Female | 56.31 $\pm$ 10.88        | 40.75 - 71.96         | 47.178     | 56.12     | 64.98     | > 0.05  |
|         | Male   | 50.22 $\pm$ 10.63        | 38.94 - 69.64         | 41.940     | 46.59     | 59.66     |         |

Table S8: Comparison of concentrations ( $\mu\text{g}\cdot\text{kg}^{-1}$ ) of essential and non essential elements in muscle of wild boar according to sexes.

| Element | Sex    | Mean $\pm$ SD           | Min - Max           | Percentile |          |          | p-Value |
|---------|--------|-------------------------|---------------------|------------|----------|----------|---------|
|         |        |                         |                     | 25th       | Mediana  | 75th     |         |
| Li      | Male   | N.D.                    | N.D.                | N.D.       | N.D.     | N.D.     |         |
|         | Female | N.D.                    | N.D.                | N.D.       | N.D.     | N.D.     |         |
| Be      | Male   | N.D.                    | N.D.                | N.D.       | N.D.     | N.D.     |         |
|         | Female | N.D.                    | N.D.                | N.D.       | N.D.     | N.D.     |         |
| Al      | Male   | 4988.70 $\pm$ 2040.85   | 2974.10 - 7731.17   | 3252.77    | 3686.66  | 7373.78  | > 0.05  |
|         | Female | 5609.52 $\pm$ 2128.07   | 2943.25 - 8990.14   | 3719.01    | 5362.61  | 7409.48  |         |
| V       | Male   | 75.22 $\pm$ 8.14        | 63.72 - 97.24       | 69.43      | 74.19    | 79.67    | > 0.05  |
|         | Female | 70.79 $\pm$ 9.57        | 54.96 - 88.89       | 62.87      | 71.37    | 77.17    |         |
| Cr      | Male   | 126.69 $\pm$ 85.25      | 45.25 - 344.67      | 72.86      | 99.36    | 126.57   | > 0.05  |
|         | Female | 145.25 $\pm$ 104.69     | 46.92 - 329.30      | 64.53      | 96.38    | 246.49   |         |
| Mn      | Male   | 571.48 $\pm$ 348.29     | 170.25 - 1126.62    | 305.99     | 356.83   | 953.88   | > 0.05  |
|         | Female | 635.25 $\pm$ 324.52     | 157.88 - 1112.37    | 312.36     | 651.45   | 927.63   |         |
| Fe      | Male   | 29086.44 $\pm$ 8235.6   | 20859.10 - 47678.89 | 22652.35   | 26209.71 | 33579.50 | > 0.05  |
|         | Female | 30802.16 $\pm$ 8759.72  | 20134.93 - 47153.56 | 22431.58   | 29981.99 | 37236.11 |         |
| Co      | Male   | 6.74 $\pm$ 5.45         | 3.30 - 20.54        | 3.91       | 4.29     | 5.66     | > 0.05  |
|         | Female | 7.85 $\pm$ 5.66         | 3.07 - 20.20        | 3.83       | 5.38     | 12.99    |         |
| Ni      | Male   | 63.32 $\pm$ 30.73       | 18.54 - 127.89      | 54.49      | 61.72    | 75.77    | > 0.05  |
|         | Female | 76.56 $\pm$ 37.97       | 17.98 - 140.74      | 57.20      | 78.93    | 98.10    |         |
| Cu      | Male   | 1628.78 $\pm$ 402.79    | 1155.87 - 2565.77   | 1429.93    | 1545.97  | 1672.55  | > 0.05  |
|         | Female | 1824.76 $\pm$ 551.12    | 1237.35 - 2909.51   | 1465.91    | 1599.36  | 2289.34  |         |
| Zn      | Male   | 27405.97 $\pm$ 15322.57 | 17298.22 - 64744.32 | 18542.67   | 19800.60 | 23270.32 | > 0.05  |
|         | Female | 33215.70 $\pm$ 17340.79 | 15558.35 - 65909.36 | 18979.04   | 22250.11 | 49030.97 |         |
| As      | Male   | 8.70 $\pm$ 1.49         | 6.90 - 11.84        | 7.56       | 8.47     | 9.45     | > 0.05  |
|         | Female | 8.79 $\pm$ 1.50         | 6.75 - 11.23        | 7.63       | 8.44     | 9.98     |         |
| Se      | Male   | 91.56 $\pm$ 54.83       | 34.00 - 228.60      | 64.14      | 84.80    | 92.30    | > 0.05  |
|         | Female | 109.36 $\pm$ 67.39      | 37.51 - 235.83      | 70.91      | 85.77    | 169.63   |         |
| Mo      | Male   | 10.63 $\pm$ 3.26        | 0.00 - 14.08        | 8.95       | 11.62    | 12.66    | > 0.05  |
|         | Female | 9.44 $\pm$ 4.08         | 0.00 - 14.18        | 8.25       | 10.51    | 12.22    |         |
| Cd      | Male   | 13.19 $\pm$ 4.60        | 7.16 - 21.58        | 8.95       | 13.39    | 16.28    | > 0.05  |
|         | Female | 12.15 $\pm$ 4.59        | 7.55 - 21.59        | 8.99       | 9.90     | 15.71    |         |
| Sb      | Male   | N.D.                    | N.D.                | N.D.       | N.D.     | N.D.     |         |
|         | Female | N.D.                    | N.D.                | N.D.       | N.D.     | N.D.     |         |
| Ba      | Male   | 119.22 $\pm$ 85.24      | 53.88 - 334.27      | 62.01      | 66.45    | 137.19   | > 0.05  |
|         | Female | 149.29 $\pm$ 97.90      | 54.86 - 358.98      | 68.02      | 122.19   | 231.84   |         |
| Tl      | Male   | 0.03 $\pm$ 0.14         | 0.00 - 0.61         | 0.00       | 0.00     | 0.00     | > 0.05  |
|         | Female | 0.07 $\pm$ 0.19         | 0.00 - 0.59         | 0.00       | 0.00     | 0.00     |         |
| Pb      | Male   | 49.37 $\pm$ 7.61        | 39.39 - 63.35       | 42.65      | 47.75    | 55.69    | > 0.05  |
|         | Female | 49.69 $\pm$ 8.59        | 35.76 - 65.91       | 44.55      | 50.20    | 55.36    |         |



Table S9: Comparison between concentrations ( $\mu\text{g}\cdot\text{kg}^{-1}$ ) of essential and non essential elements in liver of wild boar and swine.

| Element | Species   | Mean $\pm$ SD            | Min - Max            | Percentile |          |          | p-Value |
|---------|-----------|--------------------------|----------------------|------------|----------|----------|---------|
|         |           |                          |                      | 25th       | Median   | 75th     |         |
| Li      | Swine     | N.D.                     | N.D.                 | N.D.       | N.D.     | N.D.     |         |
|         | Wild boar | N.D.                     | N.D.                 | N.D.       | N.D.     | N.D.     |         |
| Be      | Swine     | N.D.                     | N.D.                 | N.D.       | N.D.     | N.D.     |         |
|         | Wild boar | N.D.                     | N.D.                 | N.D.       | N.D.     | N.D.     |         |
| Co      | Swine     | 28.25 $\pm$ 8.16         | 13.8 - 44.6          | 23.88      | 27.91    | 34.16    | p>0.05  |
|         | Wild boar | 27.05 $\pm$ 4.42         | 21.43 - 36.6         | 23.67      | 25.33    | 30.15    |         |
| Cu      | Swine     | 16700.72 $\pm$ 8969.23   | 7279.6 - 34576.3     | 9115.43    | 16819.97 | 18882.48 | p<0.05  |
|         | Wild boar | 3424.16 $\pm$ 569.92     | 2393.55 - 4606.1     | 2906.65    | 3495.93  | 3797.72  |         |
| Fe      | Swine     | 336705.3 $\pm$ 95226.41  | 186823.61 - 572838.8 | 282535.7   | 318962.8 | 390318.2 | p<0.05  |
|         | Wild boar | 218701.16 $\pm$ 78400.76 | 109920.34 - 356189.4 | 160623.3   | 206287.8 | 299503.5 |         |
| Mn      | Swine     | 2634.62 $\pm$ 977.11     | 1315.67 - 4737.6     | 1656.91    | 2657.7   | 3181.25  | p>0.05  |
|         | Wild boar | 2374.59 $\pm$ 835.9      | 1396.41 - 3917.7     | 1582.97    | 2301.61  | 3088.43  |         |
| Mo      | Swine     | 2054.06 $\pm$ 307.38     | 1421.13 - 2718.3     | 1927.27    | 2076.3   | 2198.3   | p<0.05  |
|         | Wild boar | 724.9 $\pm$ 192.66       | 481.11 - 1039.3      | 559.68     | 626.64   | 909.07   |         |
| Ni      | Swine     | 58.99 $\pm$ 57.33        | 10.55 - 153.4        | 13.15      | 35.05    | 132.07   | p>0.05  |
|         | Wild boar | 27.61 $\pm$ 8.16         | 15.59 - 41.1         | 21.35      | 26.25    | 35.23    |         |
| Se      | Swine     | 320.24 $\pm$ 25.86       | 273.18 - 371.9       | 297.49     | 318.91   | 341.34   | p<0.05  |
|         | Wild boar | 239.06 $\pm$ 47.47       | 148.57 - 309.4       | 208.26     | 245.12   | 276.96   |         |
| Zn      | Swine     | 66531.84 $\pm$ 17365.84  | 36310.75 - 99415.6   | 51416.77   | 66518.42 | 80377.87 | p<0.05  |
|         | Wild boar | 31236.67 $\pm$ 3644.44   | 25470.24 - 40956.2   | 28716.08   | 30197.55 | 32883    |         |
| Al      | Swine     | 12029.17 $\pm$ 9551.85   | 2176.35 - 28549.4    | 2683.48    | 13290.72 | 18216.73 | p>0.05  |
|         | Wild boar | 4055.12 $\pm$ 585.28     | 3155.22 - 5814.6     | 3650.7     | 3997.19  | 4275.25  |         |
| As      | Swine     | 6.28 $\pm$ 1.73          | 3.3 - 10.2           | 5.08       | 6.31     | 7.13     | p<0.05  |
|         | Wild boar | 14.49 $\pm$ 9.25         | 7.06 - 34.6          | 7.81       | 10.71    | 14.87    |         |
| Ba      | Swine     | 73.94 $\pm$ 42.03        | 32.66 - 162.7        | 38.76      | 75.77    | 84.54    | p>0.05  |
|         | Wild boar | 73 $\pm$ 20.69           | 49.83 - 105.3        | 53.4       | 68.69    | 94.38    |         |
| Cd      | Swine     | 48.34 $\pm$ 11.25        | 33.07 - 75.6         | 42.15      | 45.45    | 51.07    | p<0.05  |
|         | Wild boar | 138.67 $\pm$ 109.89      | 38.52 - 313.4        | 48.35      | 53.87    | 243.55   |         |
| Cr      | Swine     | 116.37 $\pm$ 127.26      | 5.52 - 329.1         | 6.71       | 47.8     | 281.41   | p>0.05  |
|         | Wild boar | 53.39 $\pm$ 24.2         | 35.91 - 122.8        | 39.83      | 44.23    | 48.61    |         |
| Pb      | Swine     | 41.17 $\pm$ 12.6         | 17.19 - 63.4         | 35.39      | 44.03    | 50.52    | p<0.05  |
|         | Wild boar | 53.75 $\pm$ 11.06        | 38.94 - 72           | 42.79      | 54.09    | 61.06    |         |
| Sb      | Swine     | N.D.                     | N.D.                 | N.D.       | N.D.     | N.D.     |         |
|         | Wild boar | N.D.                     | N.D.                 | N.D.       | N.D.     | N.D.     |         |
| Tl      | Swine     | N.D.                     | N.D.                 | N.D.       | N.D.     | N.D.     |         |
|         | Wild boar | 5.46 $\pm$ 4             | 0.69 - 11.6          | 1.94       | 5.33     | 9.8      |         |
| V       | Swine     | 68.4 $\pm$ 21.47         | 35.93 - 113.5        | 51.26      | 66.94    | 72.46    | p<0.05  |
|         | Wild boar | 46.14 $\pm$ 9.06         | 33.56 - 68.9         | 38.96      | 44.45    | 51.55    |         |

Table S10: Comparison between concentrations ( $\mu\text{g}\cdot\text{kg}^{-1}$ ) of essential and non essential elements in muscle of wild boar and swine.

| Element | Species   | Mean $\pm$ SD           | Min - Max           | Percentile |          |          | p-Value |
|---------|-----------|-------------------------|---------------------|------------|----------|----------|---------|
|         |           |                         |                     | 25th       | Median   | 75th     |         |
| Li      | Swine     | N.D.                    | N.D.                | N.D.       | N.D.     | N.D.     |         |
|         | Wild boar | N.D.                    | N.D.                | N.D.       | N.D.     | N.D.     |         |
| Be      | Swine     | N.D.                    | N.D.                | N.D.       | N.D.     | N.D.     |         |
|         | Wild boar | N.D.                    | N.D.                | N.D.       | N.D.     | N.D.     |         |
| Co      | Swine     | 3.31 $\pm$ 0.99         | 2.07 - 5.82         | 2.402      | 3.26     | 3.98     | p<0.05  |
|         | Wild boar | 7.37 $\pm$ 5.53         | 3.07 - 20.54        | 3.905      | 5.19     | 5.86     |         |
| Cu      | Swine     | 2192.87 $\pm$ 267.98    | 1696.51 - 2661.15   | 1958.62    | 2234.89  | 2421.32  | p<0.05  |
|         | Wild boar | 1740.77 $\pm$ 497.28    | 1155.87 - 2909.51   | 1429.928   | 1572.22  | 1786.96  |         |
| Fe      | Swine     | 30023.03 $\pm$ 5011.51  | 20760.52 - 42414    | 26520.222  | 29857.6  | 33008.94 | p>0.05  |
|         | Wild boar | 30066.85 $\pm$ 8479.75  | 20134.93 - 47678.89 | 22563.592  | 28726.03 | 34355.85 |         |
| Mn      | Swine     | 344.42 $\pm$ 72.72      | 188.29 - 445.62     | 283.923    | 353.97   | 402.32   | p<0.05  |
|         | Wild boar | 607.92 $\pm$ 332.26     | 157.88 - 1126.62    | 305.993    | 562.58   | 931.27   |         |
| Mo      | Swine     | 32.14 $\pm$ 5.93        | 18.64 - 42.71       | 29.2       | 32.7     | 35.49    | p<0.05  |
|         | Wild boar | 9.95 $\pm$ 3.76         | 0 - 14.18           | 8.395      | 11.04    | 12.41    |         |
| Ni      | Swine     | 22.18 $\pm$ 23.45       | 8.17 - 71.17        | 9.352      | 10.5     | 12.75    | p<0.05  |
|         | Wild boar | 70.88 $\pm$ 35.28       | 17.98 - 140.74      | 57.045     | 71.78    | 94.83    |         |
| Se      | Swine     | 103.71 $\pm$ 13.68      | 84.83 - 130.56      | 92.343     | 102.44   | 112.35   | p<0.05  |
|         | Wild boar | 101.72 $\pm$ 62.24      | 34 - 235.83         | 66.12      | 84.8     | 99.84    |         |
| Zn      | Swine     | 46536.27 $\pm$ 5740.44  | 36327.3 - 59087.38  | 42291.388  | 47079.32 | 50876.56 | p<0.05  |
|         | Wild boar | 30725.82 $\pm$ 16568.13 | 15558.35 - 65909.36 | 18542.667  | 21048.99 | 47944.67 |         |
| Al      | Swine     | 3191.31 $\pm$ 839.44    | 2126.67 - 4965.56   | 2602.878   | 2842.53  | 3995.05  | p<0.05  |
|         | Wild boar | 5343.45 $\pm$ 2089.05   | 2943.25 - 8990.14   | 3411.582   | 4160.85  | 7398.73  |         |
| As      | Swine     | 6.41 $\pm$ 1.47         | 4.4 - 8.85          | 5.13       | 5.77     | 7.82     | p<0.05  |
|         | Wild boar | 8.76 $\pm$ 1.48         | 6.75 - 11.84        | 7.558      | 8.44     | 9.74     |         |
| Ba      | Swine     | 49.47 $\pm$ 17.20       | 19.92 - 80.39       | 35.442     | 44.83    | 65.02    | p<0.05  |
|         | Wild boar | 136.41 $\pm$ 92.83      | 53.88 - 358.98      | 63.73      | 108.53   | 148.91   |         |
| Cd      | Swine     | 2.50 $\pm$ 1.80         | 0.56 - 6.1          | 0.682      | 1.98     | 3.24     | p<0.05  |
|         | Wild boar | 12.60 $\pm$ 4.57        | 7.16 - 21.59        | 8.877      | 10.43    | 15.8     |         |
| Cr      | Swine     | 25.02 $\pm$ 15.67       | 8.73 - 54.67        | 14.027     | 19.9     | 39.67    | p<0.05  |
|         | Wild boar | 137.29 $\pm$ 96.17      | 45.25 - 344.67      | 64.935     | 99.02    | 138      |         |
| Pb      | Swine     | 41.06 $\pm$ 39.81       | 4.97 - 115.45       | 7.09       | 10.59    | 83.22    | p>0.05  |
|         | Wild boar | 49.56 $\pm$ 8.09        | 35.76 - 65.91       | 43.127     | 49.6     | 55.72    |         |
| Sb      | Swine     | N.D.                    | N.D.                | N.D.       | N.D.     | N.D.     |         |
|         | Wild boar | N.D.                    | N.D.                | N.D.       | N.D.     | N.D.     |         |
| Tl      | Swine     | N.D.                    | N.D.                | N.D.       | N.D.     | N.D.     |         |
|         | Wild boar | 0.05 $\pm$ 0.17         | 0 - 0.61            | 0          | 0        | 0        |         |
| V       | Swine     | 59.43 $\pm$ 7.17        | 46.39 - 74.19       | 53.547     | 60.58    | 64.4     | p<0.05  |
|         | Wild boar | 72.69 $\pm$ 9.15        | 54.96 - 97.24       | 65.58      | 72.18    | 79.67    |         |
